# Supplementary material for: Application of spin-ratio scaled MP2 for the prediction of intermolecular interactions in chemical systems
Source: Royal Society of Chemistry journal article supplement (doi:10.1039/c7cp04391k), 2017-01-01
Supplement: c7cp04391k1.pdf [file c7cp04391k1.pdf]

## ***Application of Spin-Ratio Scaled MP2 for the prediction of intermolecular interactions in chemical systems***

Samuel Y. S. Tan,<sup>a</sup> Luke Wylie,<sup>a</sup> Ivan Begic,<sup>a</sup> Dennis Tran,<sup>a</sup> Ekaterina I. Izgorodina<sup>a,\*</sup>

School of Chemistry, Monash University, 17 Rainforest Walk, Clayton, Victoria, 3800 AUSTRALIA

Corresponding author: [katya.pas@monash.edu](mailto:katya.pas@monash.edu)

Supplementary Information

**Table S1.**  $c_{OS}$  and  $c_{SS}$  coefficients in the SRS-MP2 method with best performing basis sets, cc-pVTZ and cc-pVQZ.

| Basis set | $\epsilon_{As}$ | $c_{OS}$ | $c_{SS}$ |
|-----------|-----------------|----------|----------|
| cc-pVTZ   | $\geq 1$        | 1.640    | -        |
|           | $< 1$           | 0.660    | 1.140    |
| cc-pVQZ   | $\geq 1$        | 1.689    | -        |
|           | $< 1$           | 0.671    | 1.119    |

**Table S2.** Error statistics for SRS-MP2/cc-pVQZ in  $\text{kJ mol}^{-1}$ .

| Dataset  | MAE <sup>[a]</sup> | SD <sup>[b]</sup> | Min  | Max |
|----------|--------------------|-------------------|------|-----|
| SNB      | 1.6                | 1.1               | -0.6 | 2.7 |
| HBIL     | 2.2                | 2.3               | -4.3 | 3.7 |
| R-IL     | 1.9                | 1.0               | -1.5 | 4.6 |
| X40      | 1.4                | 2.1               | -1.2 | 8.0 |
| MDM2-p53 | 1.2                | 1.4               | -2.0 | 1.6 |

[a] Mean Absolute Error. [b] Standard Deviation

**Table S3.** Percentage error statistics for SRS-MP2/cc-pVQZ.

| Dataset  | MAE  | SD  | Max  |
|----------|------|-----|------|
| SNB      | 3.0  | 1.9 | 6.1  |
| HBIL     | 6.9  | 3.6 | 15.8 |
| R-IL     | 9.7  | 5.9 | 28.8 |
| X40      | 11.6 | 5.9 | 27.9 |
| MDM2-p53 | 3.8  | 2.1 | 6.9  |

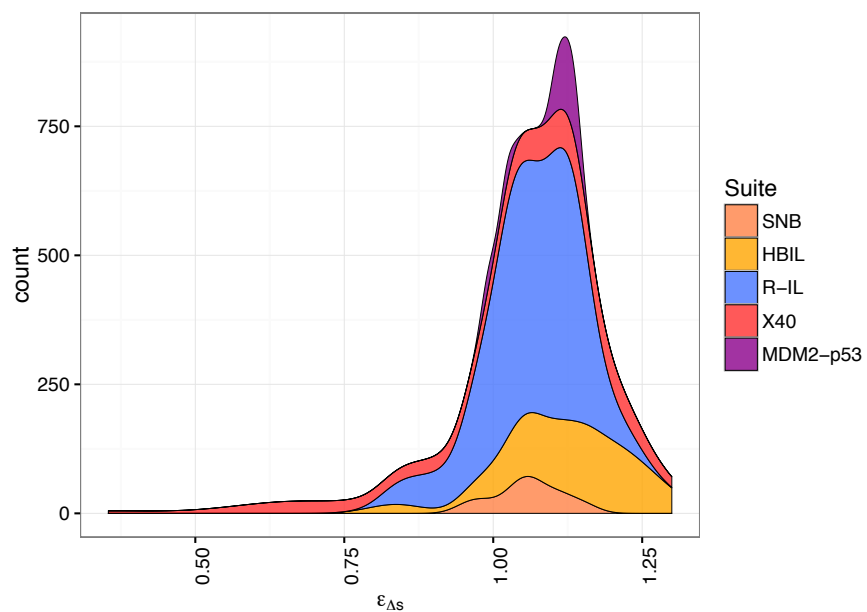

**Figure S1.** Ratio distributions for the different datasets.

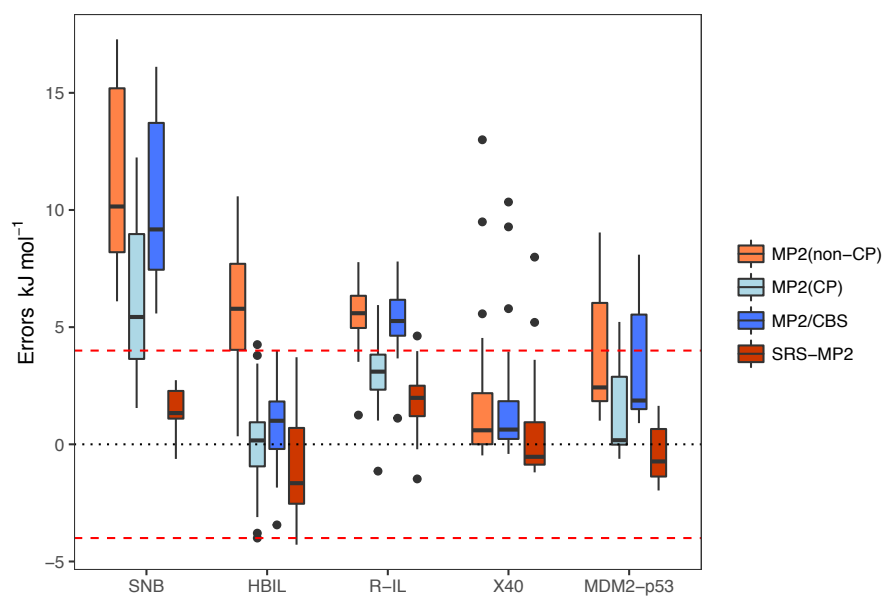

**Figure S2.** Error distributions for SRS-MP2 and original MP2 methods using the cc-pVQZ basis set across different datasets.

**Table S4.** CCSD(T)/CBS interaction correlation energies for the different datasets in  $\text{kJ mol}^{-1}$ .

| Dataset  | Mean <sup>1</sup> | SD   | Min   | Max   |
|----------|-------------------|------|-------|-------|
| SNB      | -54.0             | 10.4 | -72.1 | -39.4 |
| HBIL     | -33.2             | 7.1  | -46.3 | -14.9 |
| R-IL     | -21.6             | 5.2  | -34.9 | -11.5 |
| X40      | -11.8             | 7.6  | -35.9 | -3.7  |
| MDM2-p53 | -34.7             | 14.0 | -56.7 | -15.0 |

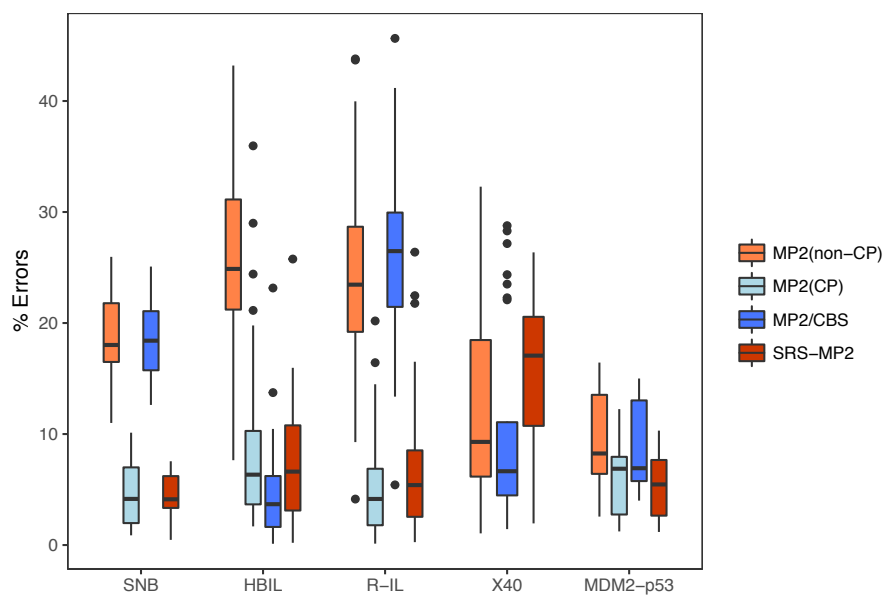

**Figure S3.** Percentage error distributions for SRS-MP2 and original MP2 methods using the cc-pVTZ basis set across different datasets.

**Table S5.** Error statistics (all numbers are in  $\text{kJ mol}^{-1}$ ) of MP2, SCS-MP2, SCS(MI), SCSN and SRS-MP2 for cc-pVTZ and cc-pVQZ basis sets, with cc-pVTZ used for SCSN. Error statistics for MP2/CBS are given for comparison.

| Basis set | Dataset  | Method       | Mean <sup>1</sup> | SD    | Min   | Max    |
|-----------|----------|--------------|-------------------|-------|-------|--------|
| cc-pVTZ   | SNB      | MP2 (non-CP) | 10.6              | 10.6  | 4.38  | 4.87   |
|           |          | MP2(CP)      | 0.64              | 2.67  | 3.41  | -4.36  |
|           |          | MP2/CBS      | 10.32             | 10.32 | 3.87  | 5.58   |
|           |          | SCS-MP2      | -13.28            | 13.28 | 2.76  | -17.27 |
|           |          | SCS(MI)      | 0.6               | 1.41  | 1.74  | -1.74  |
|           |          | SCSN         | -3.52             | 3.52  | 0.84  | -4.55  |
|           | HBIL     | MP2 (non-CP) | 8.64              | 8.64  | 3.5   | 1.36   |
|           |          | MP2(CP)      | -1.91             | 2.61  | 2.45  | -7.49  |
|           |          | MP2/CBS      | 0.84              | 1.44  | 1.59  | -3.44  |
|           |          | SCS-MP2      | -10               | 10    | 2.33  | -14.1  |
|           |          | SCS(MI)      | -1.73             | 2.44  | 2.44  | -6.38  |
|           |          | SCSN         | -4.07             | 4.21  | 2.48  | -9.68  |
|           | R-IL     | MP2 (non-CP) | 4.98              | 4.98  | 1.05  | 0.85   |
|           |          | MP2(CP)      | 0.01              | 1     | 1.29  | -4.15  |
|           |          | MP2/CBS      | 5.35              | 5.35  | 1.14  | 1.11   |
|           |          | SCS-MP2      | -5.62             | 5.62  | 1.88  | -11.27 |
|           |          | SCS(MI)      | 0.23              | 1.16  | 1.49  | -4.12  |
|           |          | SCSN         | -1.37             | 1.75  | 1.64  | -5.35  |
|           | X40      | MP2 (non-CP) | 1.05              | 1.75  | 2.85  | -1.82  |
|           |          | MP2/CBS      | 1.6               | 1.68  | 2.6   | -0.41  |
|           |          | SRS-MP2      | -0.26             | 1.65  | 2.04  | -2.97  |
|           | MDM2-p53 | MP2 (non-CP) | 3.76              | 3.76  | 3.2   | 0.58   |
|           |          | MP2(CP)      | -1.5              | 1.82  | 1.56  | -4.26  |
|           |          | MP2/CBS      | 3.48              | 3.48  | 2.93  | 0.9    |
| SCS-MP2   |          | -9.65        | 9.65              | 3.7   | -16.1 |        |
| SCS(MI)   |          | -2.11        | 2.11              | 0.94  | -3.00 |        |
| SCSN      |          | -4.69        | 4.69              | 0.83  | -5.16 |        |
| cc-pVQZ   | SNB      | MP2 (non-CP) | 11.29             | 11.29 | 4.16  | 6.1    |
|           |          | MP2(CP)      | 6.39              | 6.39  | 3.62  | 1.55   |
|           |          | MP2/CBS      | 10.32             | 10.32 | 3.87  | 5.58   |
|           |          | SCS-MP2      | -8.49             | 8.49  | 2.27  | -11.9  |

|              |              |       |      |      |        |
|--------------|--------------|-------|------|------|--------|
|              | SCS(MI)      | 0.51  | 1.12 | 1.39 | -1.19  |
|              | SRS-MP2      | 1.36  | 1.55 | 1.14 | -0.62  |
| HBIL         | MP2 (non-CP) | 5.7   | 5.7  | 2.54 | 0.34   |
|              | MP2(CP)      | 0.17  | 1.51 | 1.96 | -4.00  |
|              | MP2/CBS      | 0.84  | 1.44 | 1.59 | -3.44  |
|              | SCS-MP2      | -8.24 | 8.24 | 1.83 | -11.2  |
|              | SCS(MI)      | -2.83 | 2.96 | 1.72 | -5.44  |
|              | SRS-MP2      | -1.06 | 2.23 | 2.26 | -4.28  |
| R-IL         | MP2 (non-CP) | 5.65  | 5.65 | 1.01 | 1.25   |
|              | MP2(CP)      | 3.16  | 3.18 | 1.15 | -1.14  |
|              | MP2/CBS      | 5.35  | 5.35 | 1.14 | 1.11   |
|              | SCS-MP2      | -2.94 | 2.94 | 1.5  | -7.62  |
|              | SCS(MI)      | 0.75  | 1.22 | 1.36 | -3.2   |
|              | SRS-MP2      | 1.86  | 1.89 | 1.00 | -1.48  |
| X40          | MP2 (non-CP) | 1.79  | 1.9  | 3.01 | -0.47  |
|              | MP2/CBS      | 1.60  | 1.68 | 2.6  | -0.41  |
|              | SRS-MP2      | 0.49  | 1.43 | 2.12 | -1.2   |
| MDM2-<br>p53 | MP2 (non-CP) | 4.00  | 4.00 | 3.16 | 1.01   |
|              | MP2(CP)      | 1.38  | 1.59 | 2.16 | -0.62  |
|              | MP2/CBS      | 3.48  | 3.48 | 2.93 | 0.9    |
|              | SCS-MP2      | -7.19 | 7.19 | 2.58 | -11.56 |
|              | SCS(MI)      | -2.58 | 2.58 | 0.74 | -3.43  |
|              | SRS-MP2      | -0.35 | 1.23 | 1.38 | -1.97  |

---

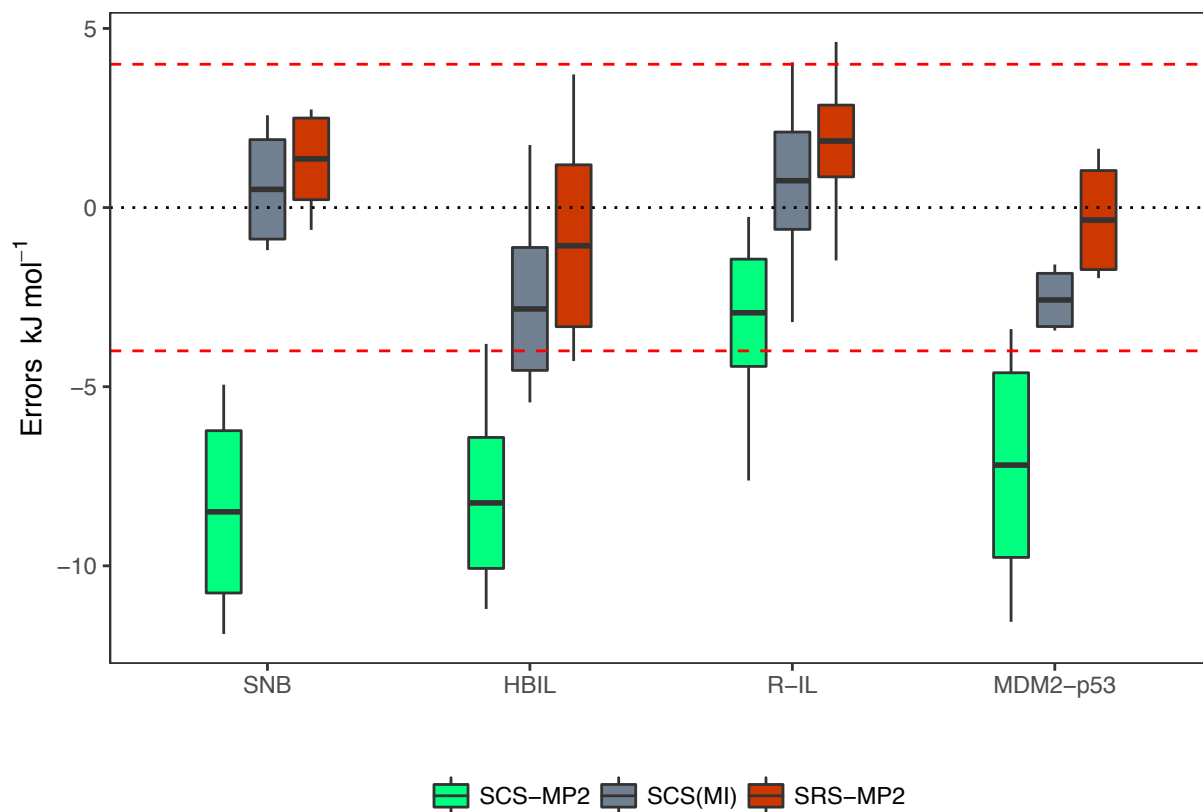

**Figure S4.** Comparison of SCS-MP2, SCS(MI) and SRS-MP2 performance for the four datasets studied for cc-pVQZ basis set, except SCSN, which is only available for aug-cc-pVTZ. SCS-MP2, SCS(MI) and SCSN used counterpoise corrected energies. The following scaling coefficients were used: 1)  $c_{OS}=1.2$  and  $c_{SS} = 1/3$  for SCS-MP2; 2)  $c_{OS}=0.31$  and  $c_{SS} = 1.46$  for SCS(MI).

**Table S5.** Error statistics (all numbers are in  $\text{kJ mol}^{-1}$ ) of the SRS-MP2 for all basis sets and all Separations for the S66x8 dataset.

| Basis set   | Separation | Mean <sup>1</sup> | SD   | Min   | Max  |
|-------------|------------|-------------------|------|-------|------|
| aug-cc-pVQZ | 0.90       | 2.79              | 2.72 | -9.01 | 1.95 |
| cc-pVQZ     | 0.90       | 1.95              | 2.24 | -7.48 | 2.21 |
| cc-pVTQZ    | 0.90       | 3.18              | 3.13 | -9.69 | 2.48 |
| aug-cc-pVQZ | 0.95       | 2.17              | 2.09 | -7.26 | 1.33 |
| cc-pVQZ     | 0.95       | 1.49              | 1.81 | -6.10 | 1.42 |
| cc-pVTQZ    | 0.95       | 2.47              | 2.50 | -7.94 | 1.65 |
| aug-cc-pVQZ | 1.00       | 1.68              | 1.64 | -5.85 | 0.92 |
| cc-pVQZ     | 1.00       | 1.15              | 1.46 | -4.98 | 1.15 |
| cc-pVTQZ    | 1.00       | 1.96              | 1.99 | -6.52 | 1.30 |
| aug-cc-pVQZ | 1.05       | 1.30              | 1.30 | -4.72 | 0.79 |
| cc-pVQZ     | 1.05       | 0.91              | 1.18 | -4.07 | 1.03 |
| cc-pVTQZ    | 1.05       | 1.50              | 1.60 | -5.36 | 1.19 |
| aug-cc-pVQZ | 1.10       | 0.99              | 1.04 | -3.81 | 0.69 |
| cc-pVQZ     | 1.10       | 0.73              | 0.96 | -3.32 | 0.95 |
| cc-pVTQZ    | 1.10       | 1.22              | 1.30 | -4.39 | 1.09 |
| aug-cc-pVQZ | 1.25       | 0.53              | 0.67 | -2.03 | 1.59 |
| cc-pVQZ     | 1.25       | 0.47              | 0.60 | -1.82 | 0.94 |
| cc-pVTQZ    | 1.25       | 0.67              | 0.76 | -2.42 | 0.86 |
| aug-cc-pVQZ | 1.50       | 0.25              | 0.32 | -0.76 | 0.99 |
| cc-pVQZ     | 1.50       | 0.23              | 0.28 | -0.69 | 0.50 |
| cc-pVTQZ    | 1.50       | 0.30              | 0.37 | -0.92 | 0.65 |
| aug-cc-pVQZ | 2.00       | 0.10              | 0.10 | -0.15 | 0.37 |
| cc-pVQZ     | 2.00       | 0.09              | 0.09 | -0.13 | 0.24 |
| cc-pVTQZ    | 2.00       | 0.10              | 0.12 | -0.19 | 0.37 |
